# Supplementary material
Source: Springer Nature journal article supplement (https://www.springermedizin.de/resource/supplementary/13075_2013_4445_MOESM1_ESM.pdf/10110424)

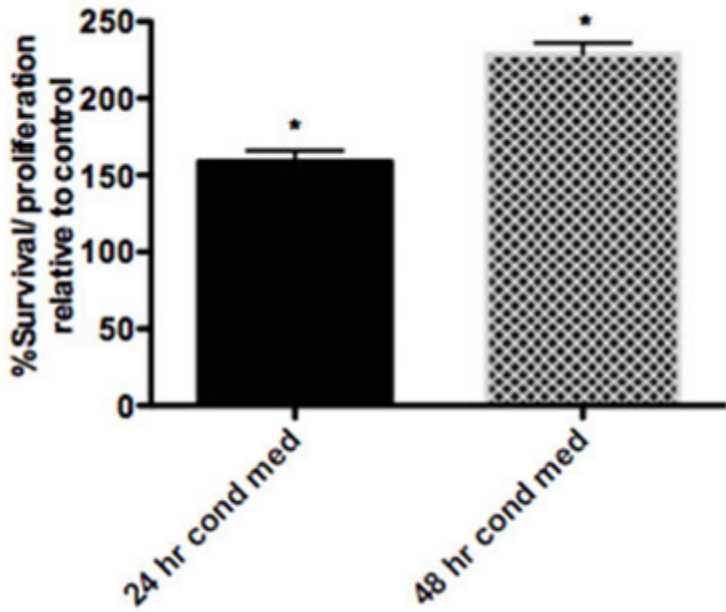

Supplement: MOESM1 [file 10110424]
